# Supplementary material
Source: HighWire-hosted journal article supplement (doi:10.1101/rna.035600.112)
Supplement: Table_S1.xlsx [file Table_S1.xlsx]

## Sheet: Sheet1
	Experiment	Oligo	Sequence
	Directional TOPO cloning	Trmt61B Fw	caccatgctaatggcatggtgccg
		Trmt61B Rev	gttaagttgtggtttgaccttcctc
		Trmt61A Fw	caccatgagcttcgtggcatacgag
		Trmt61A Rev	gcctggggtcttggtgg
		Trmt6 Fw	caccatggagggctcaggggagcagcc
		Trmt6 Rev	agagtcagactctgggcattttc
	Quantitative RT-PCR	GAPDH Fw	gtcagtggtggacctgacct
		GAPDH Rev	tgctgtagccaaattcgttg
		Trmt61B Fw	atttcaggagcaaccgaaga
		Trmt61B Rev	caaggcaaaccaaccaatct
		Trmt6 Fw	tagtcgtttccaccccactc
		Trmt6 Rev	aagataacccccacctccac
		tRNA Leu(UUR) Fw	gcagagcccggtaatcgc
		tRNA Leu(UUR) Rev	ctctgactgtaaagttttaagttttatgc
		RNA19 Fw	ttcctcttcttaacaacatacc
		RNA19 Rev	gaggagtaggaggttggc
	siRNAs	Luciferase sense	cguacgcggaauacuucgaag
		Luciferase antisense	ucgaaguauuccgcguacgau
		Trmt61B si1 sense	ggagcaaccgaagacauaaag
		Trmt61B si1 antisense	uuaugucuucgguugcuccau
		Trmt61B si2 sense	caaccgaagacauaaaaucag
		Trmt61B si2 antisense	gauuuuaugucuucgguugau
		Trmt6 sense	agagcagaggaaaagacauag
		Trmt6 antisense	augucuuuuccucugcucuau
	Primer extension	mt tRNA Leu (UUR)	tggtgttaagaagagg
		mt tRNA Ser (UCN)	tggcaaaaaaggaagg
		mt tRNA Lys	tggtcactgtaaagag
		cyto tRNA His	tggtgccgtgactcgg
	Recombinant His-Trmt61B expression	rTrmt61B Fw	caacgtgctagcgctcggtcactgtgttgc
		rTrmt61B Rev	tgcgtaaagctttcagttaagttgtggtttgacct
	T7 transcription template PCR	mt tRNA Leu(UUR) T7 Fw	taatacgactcactatagttaagatggcagagcccggtaatcgcataaaacttaaaactttacagtcagaggt
		mt tRNA Leu(UUR) T7 Rev	tggtgttaagaagaggaattgaacctctgactgtaaagttttaagttt
