# Supplementary material
Source: HighWire-hosted journal article supplement (doi:10.1101/rna.035600.112)
Supplement: Table_S2.xlsx [file Table_S2.xlsx]

## Sheet: Sheet1
	Protein	Specie	ID
	Eukatyotic Trmt61B	Homo sapiens	NP_060380.3
		Bos taurus	XP_002691541.1
		Canis familiaris	E2RGW8
		Monodelphis domestica	XP_001380612.1
		Anolis carolinensis	XP_003216124.1
		Danio rerio	XP_001337498.2
	Eukaryotic Trmt61A	Homo sapiens	NP_689520.2
		Ciona intestinalis	XP_002129825.1
		Drosophila melanogaster	NP_651461.1
		Caenorharbiditis elegans	NP_493229.1
		Schizosaccharomyces pombe	NP_593567.1
		Saccharomyces cerevisiae	NP_012410.1
	Bacterial TrmI	Thermus thermophilus	YP_004219.1
		Marinithermus hydrothermalis	YP_004368184
		Streptomyces cattleya	YP_004914658
		Saccharomonospora azurea	ZP_09832420.1
		Gordonia polyisoprenivorans	ZP_09270689.1
		Mycobacterium avium	NP_960776
		Mycobacterium tuberculosis	NP_216634.1
	Archeal TrmI	Methanocaldococcus jannaschii	NP_247100.1
		Pyrococcus abyssi	NP_126121.1
		Thermococcus onnurineus	YP_002307726
		Sulfolobus tokodaii	NP_376241
		Sulfolobus islandicus	YP_002829727
